# Supplementary material
Source: HighWire-hosted journal article supplement (https://heart.bmj.com/content/103/22/1821)
Supplement: inline-supplementary-material-2 [file inline-supplementary-material-2.pdf]

**Supplementary Table 1. Patients' characteristics by case**

| Patient | Age | Gender | QTc (msec) | Ongoing inflammatory diseases                                              | CRP (mg/dl) | Concomitant QTc-prolonging factors                                                                                                                  |                           |
|---------|-----|--------|------------|----------------------------------------------------------------------------|-------------|-----------------------------------------------------------------------------------------------------------------------------------------------------|---------------------------|
|         |     |        |            |                                                                            |             | Non-pharmacologic                                                                                                                                   | Drugs                     |
| 1       | 78  | ♀      | 690        | Sepsis ( <i>Enterococcus faecalis</i> )                                    | 29.65       | Left ventricular hypertrophy, chronic kidney disease hypokaliemia                                                                                   | Levofloxacin, Fluconazole |
| 2       | 74  | ♂      | 620        | Acute infective endocarditis ( <i>Staphylococcus Hominis</i> )             | 20.15       | Subarachnoid haemorrhage, chronic coronary artery disease, sinus bradycardia, diabetes mellitus(type II), chronic kidney disease, anti-Ro/SSA       | -                         |
| 3       | 46  | ♀      | 570        | Sepsis ( <i>Candida Albicans</i> )                                         | 18.39       | Chronic coronary artery disease ,hypokaliemia                                                                                                       | Amiodarone, Ciprofloxacin |
| 4       | 81  | ♀      | 640        | Sepsis ( <i>Staphylococcus Hominis</i> ) in HIV infection                  | 11.69       | Acute coronary syndrome, hypokaliemia, HIV infection, chronic kidney disease                                                                        | Protease inhibitors       |
| 5       | 84  | ♀      | 530        | NI                                                                         | 11.6        | Acute coronary syndrome, left ventricular hypertrophy, anti-Ro/SSA                                                                                  | Sertraline                |
| 6       | 85  | ♀      | 675        | Pneumonia and sepsis                                                       | 11.6        | Left ventricular hypertrophy, diabetes mellitus(type II), hypokaliemia, hypomagnesemia                                                              | Amiodarone, Sertraline    |
| 7       | 75  | ♀      | 530        | Undifferentiated chronic arthritis                                         | 10.0        | Left ventricular hypertrophy, chronic coronary artery disease, complete AVB, diabetes mellitus(type II), hypokaliemia, hypocalcemia, hypomagnesemia | -                         |
| 8       | 74  | ♂      | 500        | Pneumonia ( <i>Enterobacter Cloacae</i> )                                  | 8.76        | Sinus bradycardia                                                                                                                                   | Fluconazole               |
| 9       | 91  | ♂      | 520        | NI                                                                         | 7.87        | High-grade AVB, chronic kidney disease, hypocalcemia,                                                                                               | -                         |
| 10      | 80  | ♀      | 530        | Prosthetic mitral valve endocarditis ( <i>Staphylococcus Epidermidis</i> ) | 7.53        | Sinus bradycardia, hypokaliemia, hypocalcemia                                                                                                       | -                         |
| 11      | 84  | ♀      | 680        | Polymyalgia rheumatica                                                     | 7.32        | Acute complete AVB, left ventricular hypertrophy                                                                                                    | Amiodarone                |
| 12      | 85  | ♂      | 660        | Pneumoniae and Sepsis                                                      | 7.15        | Acute coronary syndrome, heart failure, left ventricular hypertrophy                                                                                | Amiodarone                |

|    |    |   |     |                                                |      |                                                                                                             |                                            |
|----|----|---|-----|------------------------------------------------|------|-------------------------------------------------------------------------------------------------------------|--------------------------------------------|
|    |    |   |     | <i>(Escherichia Coli)</i>                      |      |                                                                                                             |                                            |
| 13 | 60 | ♂ | 510 | Pneumonia                                      | 5.77 | Acute coronary syndrome,hypokaliemia,anti-Ro/SSA                                                            | -                                          |
| 14 | 30 | ♀ | 600 | NI                                             | 5.55 | Anorexia nervosa,hypokaliemia,anti-Ro/SSA                                                                   | Fluoxetine,Clozapine,<br>Clomipramine      |
| 15 | 53 | ♂ | 520 | Rheumatoid arthritis                           | 5.5  | Acute coronary syndrome,heart failure,diabetes mellitus(type II), hypocalcemia,anti-Ro/SSA                  | -                                          |
| 16 | 88 | ♀ | 640 | NI                                             | 4.21 | Acute coronary syndrome,left ventricular hypertrophy,hypokaliemia                                           | Amiodarone, Chlarythromicine               |
| 17 | 68 | ♂ | 520 | Sepsis<br><i>(Staphylococcus Haemoliticus)</i> | 3.81 | Hypokaliemia,hypocalcemia,chronic kidney disease,diabetes mellitus(type II),chronic coronary artery disease | Promazine,Prometazine,<br>Dexmedetomidine  |
| 18 | 79 | ♂ | 610 | NI                                             | 3.22 | Acute coronary syndrome,hypokaliemia,anti-Ro/SSA                                                            | Amiodarone                                 |
| 19 | 77 | ♀ | 620 | NI                                             | 3.16 | Acute complete AVB                                                                                          | Donezepil                                  |
| 20 | 81 | ♀ | 660 | NI                                             | 3.12 | Dilated cardiomyopathy                                                                                      | Amiodarone                                 |
| 21 | 95 | ♀ | 570 | NI                                             | 2.73 | Hypothyroidism,left ventricular hypertrophy,anti-Ro/SSA                                                     | Sertraline                                 |
| 22 | 65 | ♀ | 560 | NI                                             | 2.66 | Hypokaliemia, hypocalcemia                                                                                  | Quetiapine, Nortriptyline,<br>Trimipramine |
| 23 | 78 | ♂ | 660 | Acute pancreatitis                             | 2.1  | Hypocalcemia,hypokaliemia,anti-Ro/SSA                                                                       | Amiodarone                                 |
| 24 | 82 | ♀ | 600 | Urinary tract infection                        | 1.7  | Hypokaliemia,hypomagnesemia,anti-Ro/SSA                                                                     | Citalopram,Promazine,<br>Chlarythromicine  |
| 25 | 85 | ♀ | 495 | Polymyalgia rheumatica                         | 1.59 | Acute II°degree 2:1 AVB,dilated cardiomyopathy,hypokaliemia                                                 | Citalopram                                 |
| 26 | 87 | ♀ | 550 | Rheumatoid arthritis                           | 1.21 | Heart failure,complete AVB,hypothyroidism,chronic kidney disease                                            | -                                          |
| 27 | 82 | ♀ | 660 | NI                                             | 1.14 | Chronic coronary artery disease,hypokaliemia,hypocalcemia,anti-Ro/SSA                                       | Amiodarone                                 |
| 28 | 81 | ♂ | 580 | Acute cholecystitis                            | 1.1  | Sinus bradycardia,hypokaliemia, chronic kidney disease,diabetes mellitus(type II)                           | Escitalopram,Memantine                     |
| 29 | 68 | ♂ | 490 | NI                                             | 0.91 | Hypokaliemia,left ventricular hypertrophy,liver cirrhosis,anti-Ro/SSA                                       | -                                          |
| 30 | 71 | ♀ | 530 | NI                                             | 0.74 | Dilated cardiomyopathy,hypocalcemia,anti-Ro/SSA                                                             | Amiodarone                                 |
| 31 | 84 | ♀ | 660 | NI                                             | 0.68 | Left ventricular hypertrophy, diabetes mellitus(type II), hypokaliemia, hypocalcemia                        | -                                          |
| 32 | 81 | ♀ | 630 | NI                                             | 0.67 | left ventricular hypertrophy,acute complete AVB,anti-Ro/SSA                                                 | -                                          |
| 33 | 91 | ♀ | 650 | -                                              | 0.44 | II°degree 2:1 AVB left ventricular hypertrophy, hypokaliemia, hypocalcemia, anti-Ro/SSA                     | -                                          |
| 34 | 85 | ♀ | 730 | -                                              | 0.36 | Hypocalcemia,hypokaliemia,sinus bradycardia                                                                 | -                                          |
| 35 | 72 | ♀ | 910 | -                                              | 0.3  | Hypocalcemia, hypomagnesemia,                                                                               | Levofloxacin, Fluconazole,                 |

|           |    |   |     |   |      |                                                                                                          |                         |
|-----------|----|---|-----|---|------|----------------------------------------------------------------------------------------------------------|-------------------------|
|           |    |   |     |   |      | anti-Ro/SSA                                                                                              | Citalopram              |
| <b>36</b> | 67 | ♂ | 620 | - | 0.23 | Sinus bradycardia, left ventricular hypertrophy, hypokaliemia,                                           | Leuprolide              |
| <b>37</b> | 85 | ♀ | 600 | - | 0.19 | Sinus bradycardia and AVBs(II-III° degree), hypokaliemia                                                 | Amiodarone              |
| <b>38</b> | 77 | ♀ | 570 | - | 0.1  | Diabetes mellitus(type II), anti-Ro/SSA                                                                  | Sotalol                 |
| <b>39</b> | 45 | ♂ | 520 | - | 0.1  | Acute coronary syndrome, left ventricular hypertrophy, hypokaliemia, hypocalcemia, anti-Ro/SSA           | -                       |
| <b>40</b> | 87 | ♀ | 580 | - | 0.1  | Chronic coronary artery disease, heart failure, left ventricular hypertrophy diabetes mellitus(type II), | Sertraline, haloperidol |

CRP: C-reactive protein; AVB: atrio-ventricular block; HIV: human immunodeficiency virus; anti-Ro/SSA: anti-Ro/SSA antibodies; NI: not identified.
