# Supplementary material
Source: HighWire-hosted journal article supplement (https://heart.bmj.com/content/103/22/1821)
Supplement: inline-supplementary-material-3 [file inline-supplementary-material-3.pdf]

**Supplementary Table 2.** Demographic, clinical and laboratory characteristics of rheumatoid arthritis patients, co-morbidity controls, and healthy controls.

|                                 | <b>RA</b>         | <b>CC</b>        | <b>HC</b>        |
|---------------------------------|-------------------|------------------|------------------|
| Patients,n                      | 10                | 10               | 10               |
| Age,years                       | 58.5(13.75)       | 80(17.5)         | 56(5)            |
| Females,n                       | 8(80%)            | 6(60%)           | 8(80%)           |
| Disease duration (RA),years     | 14.4±11.4         | -                | -                |
| DAS28*                          | 5.8±1.3           | -                | -                |
| Patients with DAS28 > 5.1*,n    | 6(60%)            | -                | -                |
| CRP,mg/dl                       | 1.89(0.73-5.46)   | 0.20(0.09-1.50)  | 0.09(0.09-0.28)  |
| Patients with CRP > 0.5 mg/dl,n | 10(100%)          | 2(20%)           | 0                |
| IL-6,pg/ml                      | 11.52(0.49-75.75) | 0.75(0.47-9.64)  | 0.49(0.49-1.25)  |
| TNFalpha,pg/ml                  | 1.38(0.61-33.63)  | 0.70 (0.55-1.01) | 0.60 (0.60-3.24) |
| IL-1,pg/ml                      | 0.18(0.11-5.73)   | 0.13(0.07-0.15)  | 0.15(0.08-0.29)  |

RA: rheumatoid arthritis; CC: co-morbidity controls; HC: healthy controls; DAS28: disease activity score in 28 joints; CRP: C-reactive protein; IL-6: interleukin-6; TNFalpha: Tumor necrosis factor alpha; IL-1beta: interleukin-1beta.

Values are expressed as mean ±standard deviation, or median (range). Age is expressed as median (interquartile range).

\*DAS28 <2.6: disease remission; 2.6-3.2: mild active disease; 3.2-5.1: moderate active disease; >5.1: severe active disease [Gaujoux-Viala C, et al. *Joint Bone Spine* 2012;79:149-155].
