# Supplementary material
Source: HighWire-hosted journal article supplement (https://heart.bmj.com/content/103/22/1821)
Supplement: inline-supplementary-material-5 [file inline-supplementary-material-5.pdf]

**Supplementary Table 3.** Ongoing inflammatory diseases, and circulating levels of CRP and inflammatory cytokines in patients with Torsades de pointes who experienced VF/CA and/or underwent electric shock (TdP-CA/VF/EcS; n=22) compared with those who did not (TdP-noCA/VF/EcS; n=18).

|                                         | TdP-VF/CA/EcS     | TdP-noVF/CA/EcS   | <i>p</i> |
|-----------------------------------------|-------------------|-------------------|----------|
| Definite inflammatory diseases, n       | 9/22(41%)         | 9/18(50%)         | 0.75     |
| <i>Acute infections</i>                 | 7/22(32%)         | 5/18(28%)         | 1.00     |
| Sepsis*                                 | 3/22(14%)         | 3/18(17%)         | 1.00     |
| Pneumonia*                              | 2/22(9%)          | 2/18(11%)         | 1.00     |
| Acute infective endocarditis            | 1/22(5%)          | 1/18(6%)          | 1.00     |
| Urinary tract infection                 | 1/22(5%)          | 0/18(0%)          | 1.00     |
| Acute cholecystitis                     | 1/22(5%)          | 0/18(0%)          | 1.00     |
| <i>Chronic immune-mediated diseases</i> | 2/22(9%)          | 3/18(17%)         | 0.65     |
| Rheumatoid arthritis                    | 2/22(9%)          | 0/18(0%)          | 0.49     |
| Polymyalgia rheumatica                  | 0/22(0%)          | 2/18(11%)         | 0.20     |
| Undifferentiated chronic arthritis      | 0/22(0%)          | 1/18(6%)          | 0.45     |
| <i>Other</i>                            | 0/22(0%)          | 1/18(6%)          | 0.45     |
| Acute pancreatitis                      | 0/22(0%)          | 1/18(6%)          | 0.45     |
| CRP, mg/dl                              | 2.93(0.1-29.65)   | 3.24(0.1-18.39)   | 0.91     |
| Patients with CRP > 0.5 mg/dl, n        | 17/22(77%)        | 15/18(83%)        | 0.71     |
| IL-6, pg/ml                             | 14.3(0.51-182.1)† | 8.4(0.68-497.3)†† | 0.30     |
| TNFalpha, pg/ml                         | 0.61(0.13-81.35)† | 0.75(0.6-3.24)††  | 0.17     |
| IL-1beta, pg/ml                         | 0.15(0.11-5.95)†  | 0.20(0.1-0.67)††  | 0.21     |

CRP: C-reactive protein; TdP: Torsades de pointes; VF: ventricular fibrillation; CA: cardiac arrest; EcS: electric shock; IL-6: interleukin-6; TNFalpha: Tumor necrosis factor alpha; IL-1beta: interleukin-1beta. \* In two patients both pneumonia and sepsis were concomitantly detected; † available in 19 out of 22 patients; †† available in 11 out of 18 patients.

Except where indicated otherwise, values are expressed as median (range). Differences were evaluated by the two-tail Mann-Whitney test or by the two-sided Fisher's exact test.
