# Supplementary material
Source: HighWire-hosted journal article supplement (https://heart.bmj.com/content/103/22/1821)
Supplement: inline-supplementary-material-6 [file inline-supplementary-material-6.pdf]

## SUPPLEMENTAL MATERIAL

### Supplemental Results

#### **QRS duration in patients with inflammatory diseases.**

In all patients of the Inflammatory Cohort, including those subjects showing QRS prolongation, QT/QTc measurement was automated. However, only a very small percentage of patients in the whole cohort (9%, 4/46) showed QRS prolongation (i.e.  $\geq 120$  ms), and their inclusion did not significantly affect the overall results.

In fact, when excluding these 4 patients, the frequency of QTc prolongation (21%, 9/42 [PRE] vs 2%, 1/42 [POST]) similarly and significantly was reduced when CRP values decreased  $>75\%$  ( $p=0.014$ ; Fisher exact test). Moreover, the mean QTc interval changes were also comparable ( $n=42$ :  $453.0\pm 28.1$  ms [PRE] vs  $431.1\pm 21.0$  ms [POST];  $\Delta$ ms:  $-21.9$  ms;  $p<0.0001$ , two tails paired T test).

When focusing on the specific effect of inflammation on these 4 patients, we found a reduction of the mean QTc ( $494.5\pm 38.1$  ms [PRE] vs  $468.2\pm 41.2$  ms [POST];  $\Delta$ ms:  $-26.3$  ms), similar to that observed in the whole cohort, despite the absence of changes in mean QRS duration ( $133.0\pm 11.9$  ms [PRE] vs  $133.2\pm 14.9$  ms [POST]).
