# Supplementary material
Source: HighWire-hosted journal article supplement (https://heart.bmj.com/content/103/22/1821)
Supplement: inline-supplementary-material-7 [file inline-supplementary-material-7.pdf]

**Supplementary Table 4.** QTc interval changes in the Inflammatory cohort [during active disease (PRE) and after therapeutic interventions resulting in a CRP decrease >75% when compared to the baseline (POST)], as assessed by using three alternative correction formulae, and their correlation with the QTc calculated with the Bazett's formula.

|                                        | <b>QTc Fridericia</b> | <b>QTc Framingham</b> | <b>QTc Hodges</b> |
|----------------------------------------|-----------------------|-----------------------|-------------------|
| <b>PRE (ms)</b>                        | 432.5±29.7            | 430.4±28.1            | 431.4±27.7        |
| <b>POST (ms)</b>                       | 419.6±27.4            | 419.9±27.1            | 418.4±27.6        |
| <b>ΔQTc (ms)</b>                       | -12.9                 | -10.5                 | -13.0             |
| <i>p</i>                               | <b>&lt;0.0001</b>     | <b>0.0014</b>         | <b>&lt;0.0001</b> |
| <br><i>Correlation with QTc Bazett</i> |                       |                       |                   |
| <b>rho</b>                             | 0.87                  | 0.83                  | 0.89              |
| <i>p</i>                               | <b>&lt;0.0001</b>     | <b>&lt;0.0001</b>     | <b>&lt;0.0001</b> |

QTc: corrected QTc interval; rho=Spearman's rank correlation coefficient.

Differences in QTc values (PRE/POST) were evaluated by the two-tail Wilcoxon matched pairs test. Correlations with the QTc calculated with Bazett's formula were evaluated by the Spearman rank correlation test.
