# Supplementary material
Source: HighWire-hosted journal article supplement (https://heart.bmj.com/content/103/22/1821)

**A**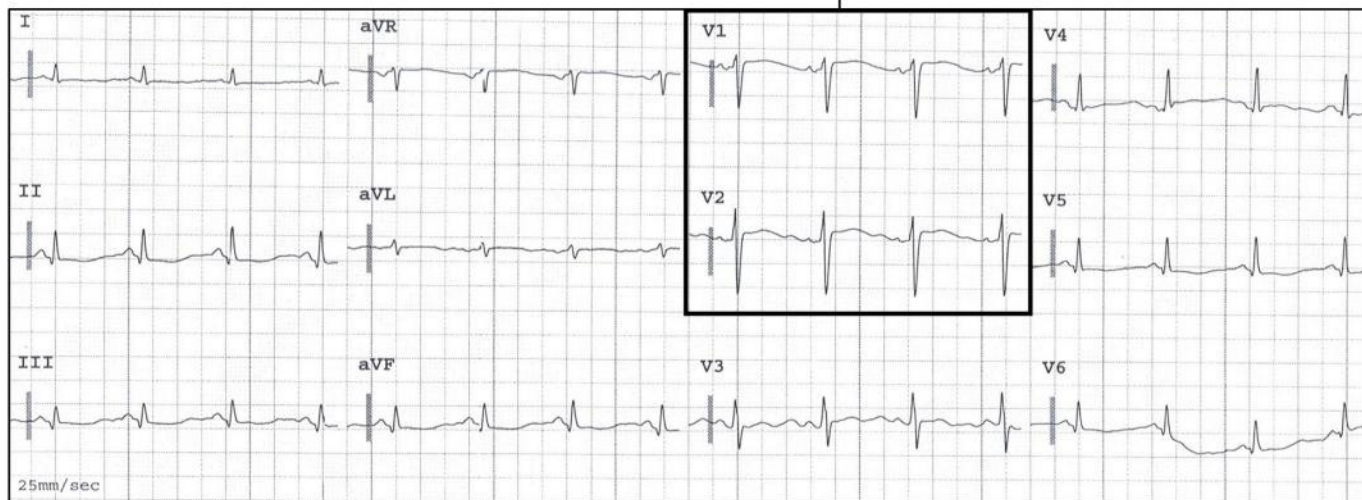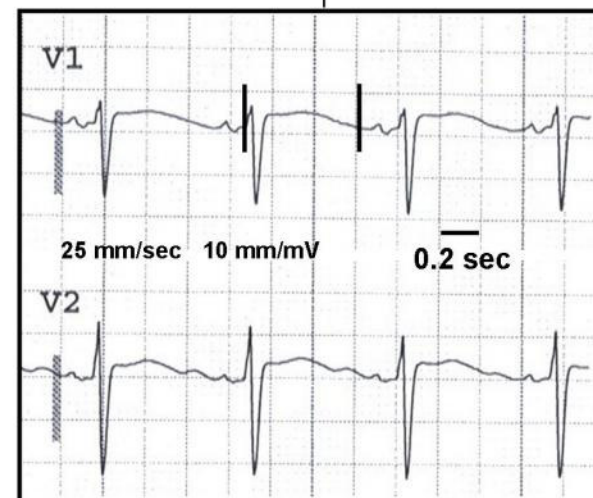**B**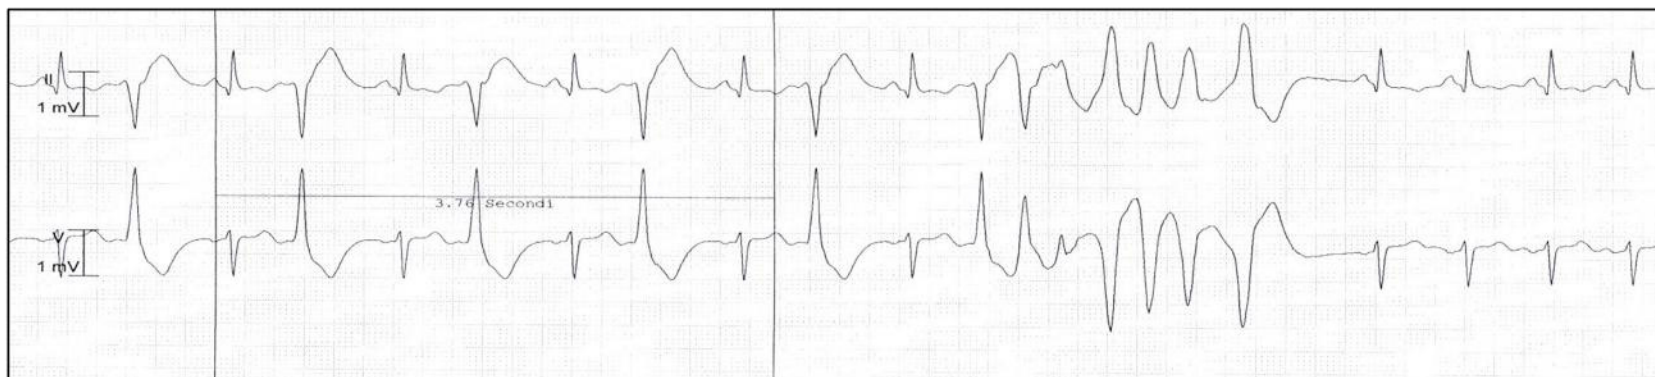**C**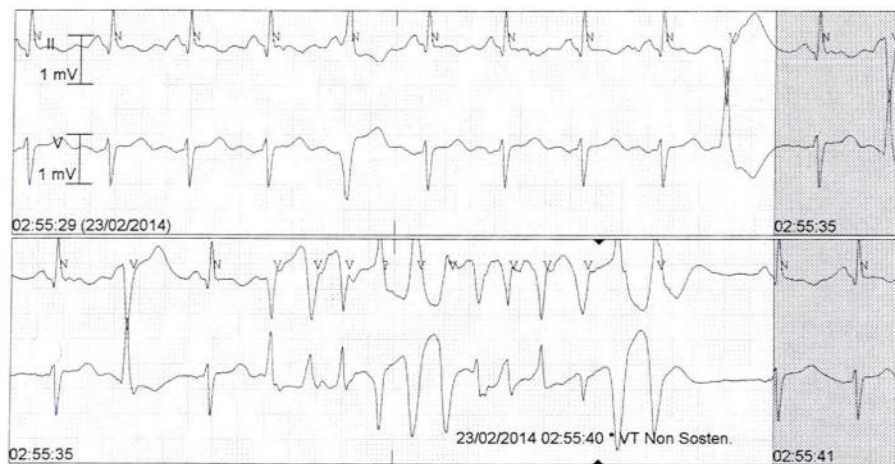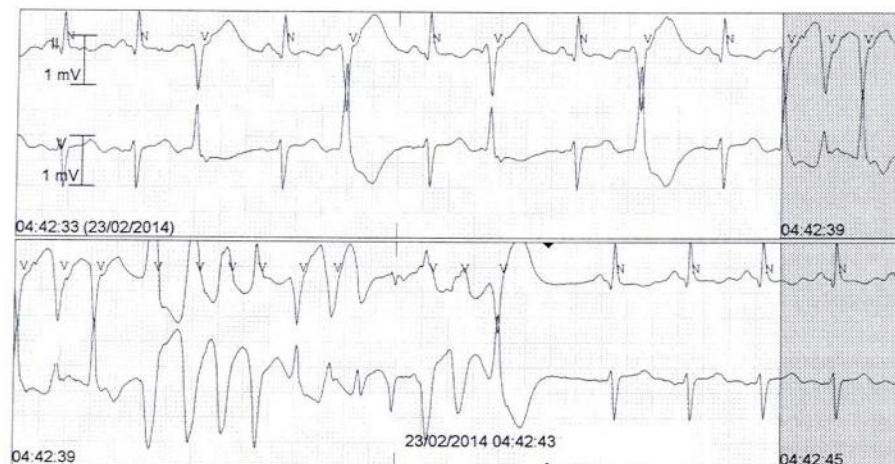

Supplement: inline-supplementary-material-4 [file inline-supplementary-material-4.pdf]
